# Supplementary material for: The rice production practices of high yield and high nitrogen use efficiency in Jiangsu, China
Source: PubMed Central journal article supplement (PMC5437039; doi:10.1038/s41598-017-02338-3), 2017-05-18
Supplement: 41598_2017_2338_MOESM1_ESM.pdf [file 41598_2017_2338_MOESM1_ESM.pdf]

1 **The rice production practices of high yield and high nitrogen use efficiency in Jiangsu, China**

2 Jiuxin Guo<sup>1,2,\*</sup>, Xiangyu Hu<sup>1,\*</sup>, Limin Gao<sup>1</sup>, Kailiu Xie<sup>1</sup>, Ning Ling<sup>1</sup>, Qirong Shen<sup>1</sup>, Shuijin Hu<sup>1,3</sup> &  
3 Shiwei Guo<sup>1</sup>

4

5 <sup>1</sup> Jiangsu Provincial Key Lab for Organic Waste Utilization, National Engineering Research Center for  
6 Organic-based Fertilizers, Jiangsu Collaborative Innovation Center for Solid Organic Waste Resource  
7 Utilization, College of Resources and Environmental Sciences, Nanjing Agricultural University,  
8 Nanjing 210095, China

9 <sup>2</sup> College of Resources and Environment, Fujian Agriculture and Forestry University, Fuzhou 350002,  
10 China

11 <sup>3</sup> Department of Plant Pathology, North Carolina State University, Raleigh, NC 27695, USA

12

13

14

15

16

17 \*These authors contributed equally to this work.

18 Correspondence and requests for materials should be addressed to S.G. (email: sguo@njau.edu.cn)

19 **Supporting Information**

20 **Extended Data Table 1** | The amount of N fertilizer applied (kg ha<sup>-1</sup>) to N managements at different  
 21 growth stages in the experiment conducted at Jiangsu in 2008-2013.

| Treatment                           | CK | FFP | OPT       |      |      |
|-------------------------------------|----|-----|-----------|------|------|
|                                     |    |     | OPT1      | OPT2 | OPT3 |
| Total N                             | 0  | 350 | 180 - 240 | 270  | 300  |
| Basal fertilizer                    | 0  | 130 | 68-91     | 102  | 114  |
| Tillering fertilizer                | 0  | 130 | 31 - 41   | 46   | 51   |
| Panicle initiation                  | 0  | 90  | 45 - 60   | 68   | 75   |
| Spikelet differentiation            | 0  | 0   | 36 - 48   | 54   | 60   |
| Total P <sub>2</sub> O <sub>5</sub> | 75 | 75  | 75        | 75   | 75   |
| Basal fertilizer                    | 75 | 75  | 75        | 75   | 75   |
| Total K <sub>2</sub> O              | 90 | 90  | 90        | 90   | 90   |
| Basal fertilizer                    | 45 | 45  | 45        | 45   | 45   |
| Panicle initiation                  | 45 | 45  | 45        | 45   | 45   |

22 CK: free-N control; FFP: farmers' fertilizer practices; OPT: optimal N managements.

23

24 **Extended Data Table 2** | The grain yield and PFP<sub>N</sub> under high yield and high efficiency (HYHE),  
 25 high yield and low efficiency (HYLE), low yield and high efficiency (LYHE) and low yield and low  
 26 efficiency (LYLE), according to the average FFP yield and N rate in Jiangsu as defined by the farmer  
 27 survey.

| Classification | Average N rate<br>(kg ha <sup>-1</sup> ) | Average yield<br>(kg ha <sup>-1</sup> ) | N rate<br>(kg ha <sup>-1</sup> ) | Grain yield<br>(kg ha <sup>-1</sup> ) | PFP <sub>N</sub><br>(kg kg <sup>-1</sup> ) | Frequency<br>(%) |
|----------------|------------------------------------------|-----------------------------------------|----------------------------------|---------------------------------------|--------------------------------------------|------------------|
| HYHE           | <336.7                                   | >8131.8                                 | 278.7 b                          | 8900.6 a                              | 32.9 a                                     | 27.2             |
| HYLE           | >336.7                                   | >8131.8                                 | 408.0 a                          | 8966.1 a                              | 22.4 b                                     | 23.1             |
| LYLE           | >336.7                                   | <8131.8                                 | 422.8 a                          | 7295.1 b                              | 17.9 c                                     | 22.0             |
| LYHE           | <336.7                                   | <8131.8                                 | 269.1 b                          | 7342.2 b                              | 28.6 ab                                    | 28.3             |

28

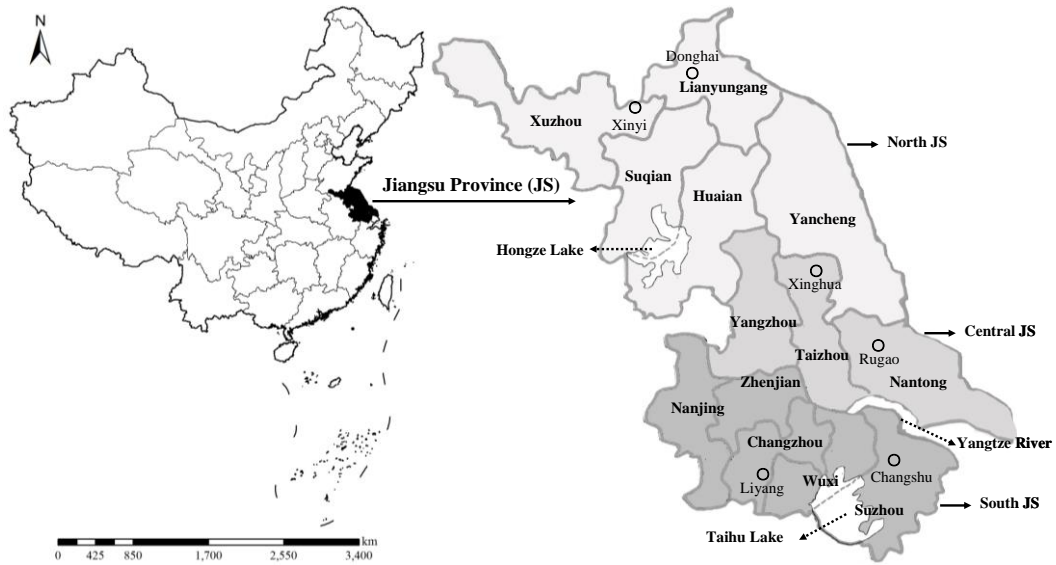

29

30 **Extended Data Figure 1** | Distribution of experimental sites (open circles) in three production regions  
 31 (grey shading) of south, central and north Jiangsu, China. The software ArcGis 10.2 and Photoshop  
 32 CS6 were used to create the map[s].

33

34

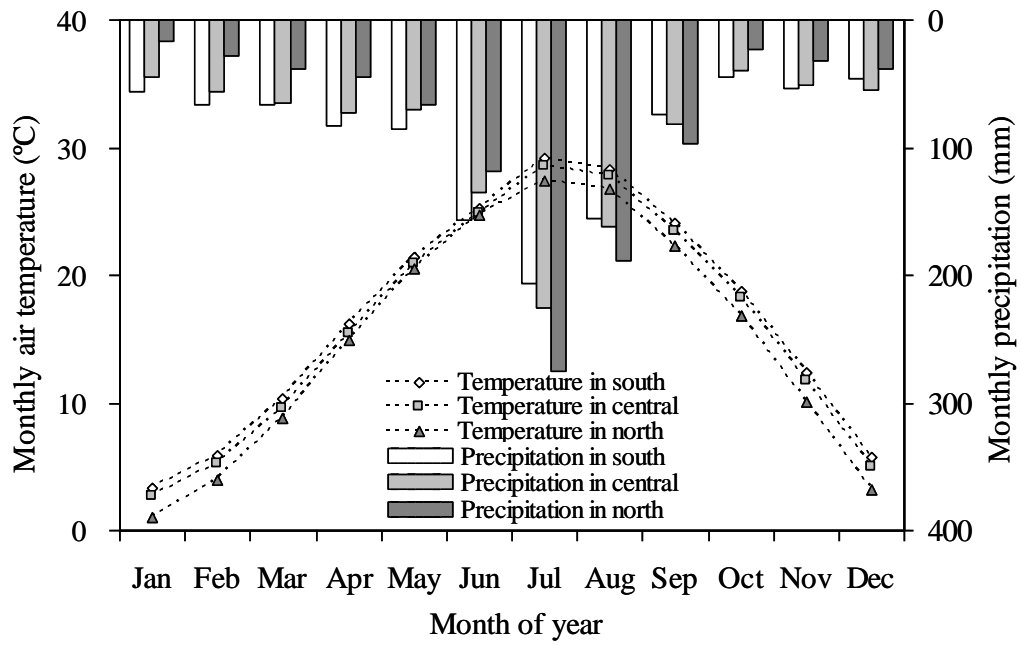

35

36 **Extended Data Figure 2** | The mean monthly temperature and precipitation in south, central and north

37 Jiangsu during the period from 2001-2013.

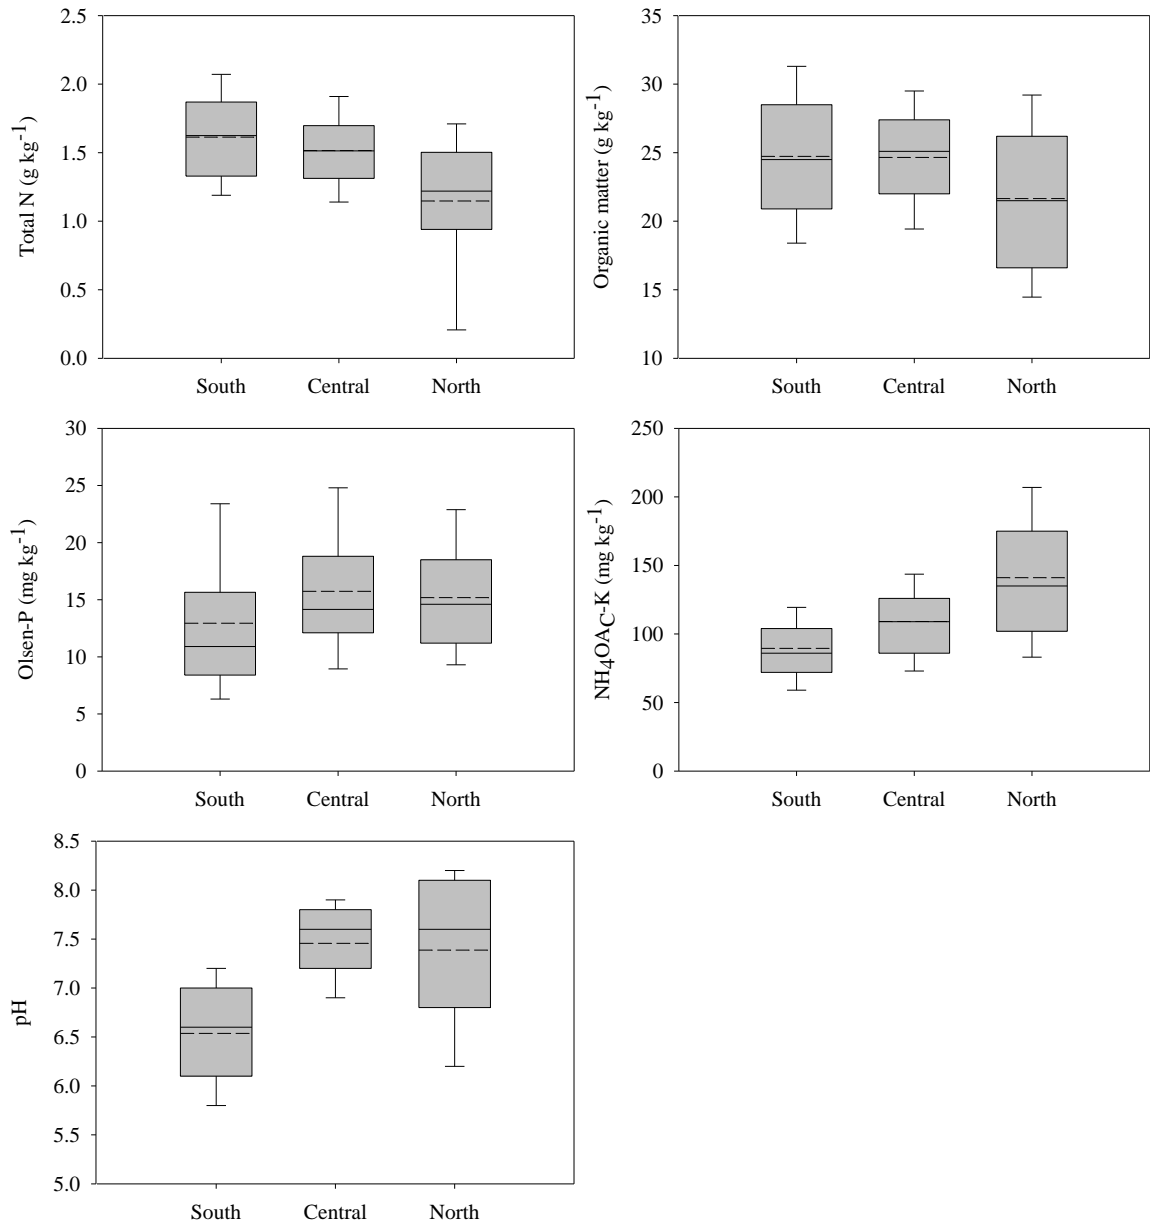

38

39 **Extended Data Figure 3** | The distribution of the physical and chemical properties of the basal

40 soil in south, central and north JS (n=1050-1350).

41

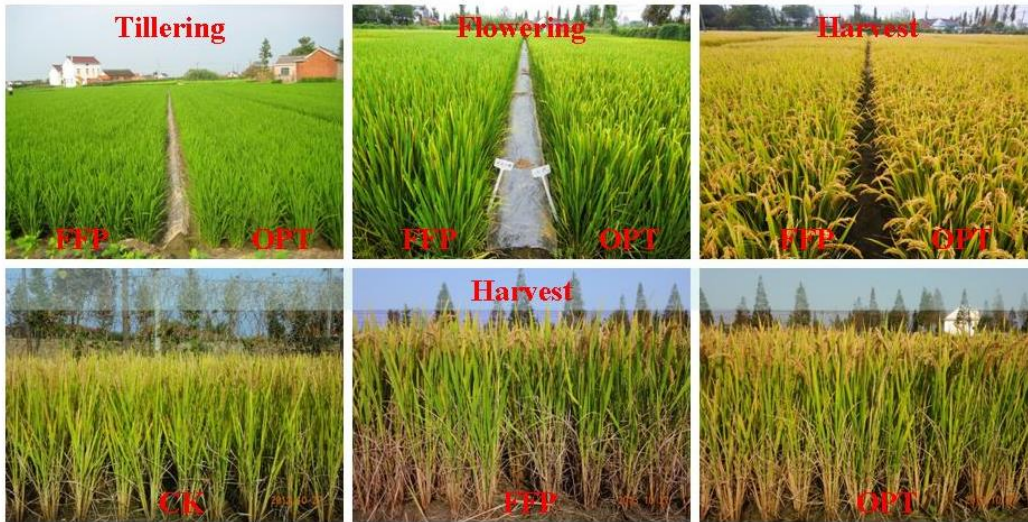

42

43 **Extended Data Figure 4** | Field images of N managements at different rice growth stages in Rugao  
 44 sites in Jiangsu. CK: free-N control; FFP: farmers' fertilizer practices; OPT: optimal N managements.

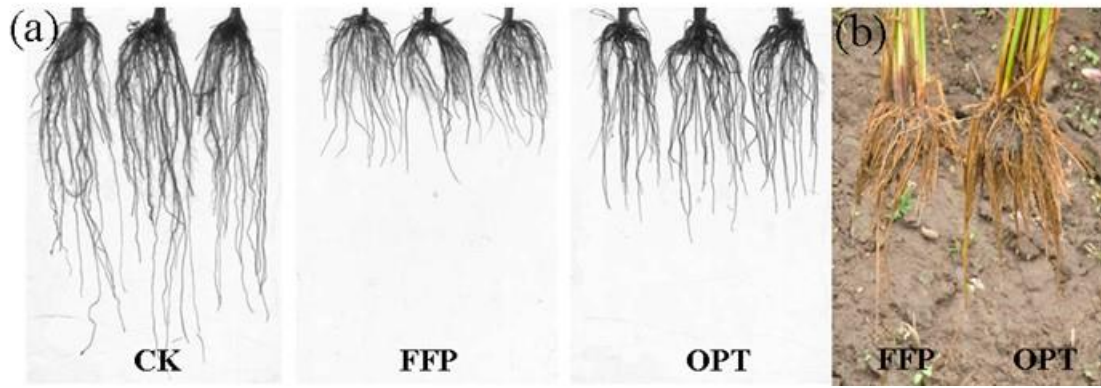

45

46

47 **Extended Data Figure 5** | Root morphology images of N managements at the rice seedling stage 10

48 days after transplanting (a) and harvest (b) stages in Rugao sites in Jiangsu. CK: free-N control; FFP:

49 farmers' fertilizer practices; OPT: optimal N managements.

50
